# Supplementary material for: Space exploration by dendritic cells requires maintenance of myosin II activity by IP3 receptor 1
Source: PubMed Central journal article supplement — EMBO J. 2015 Jan 30;34(6):798–810. doi: 10.15252/embj.201489056 (PMC4369315; doi:10.15252/embj.201489056), 2015-01-30
Supplement: embj0034-0798-sd2.pdf [file embj0034-0798-sd2.pdf]

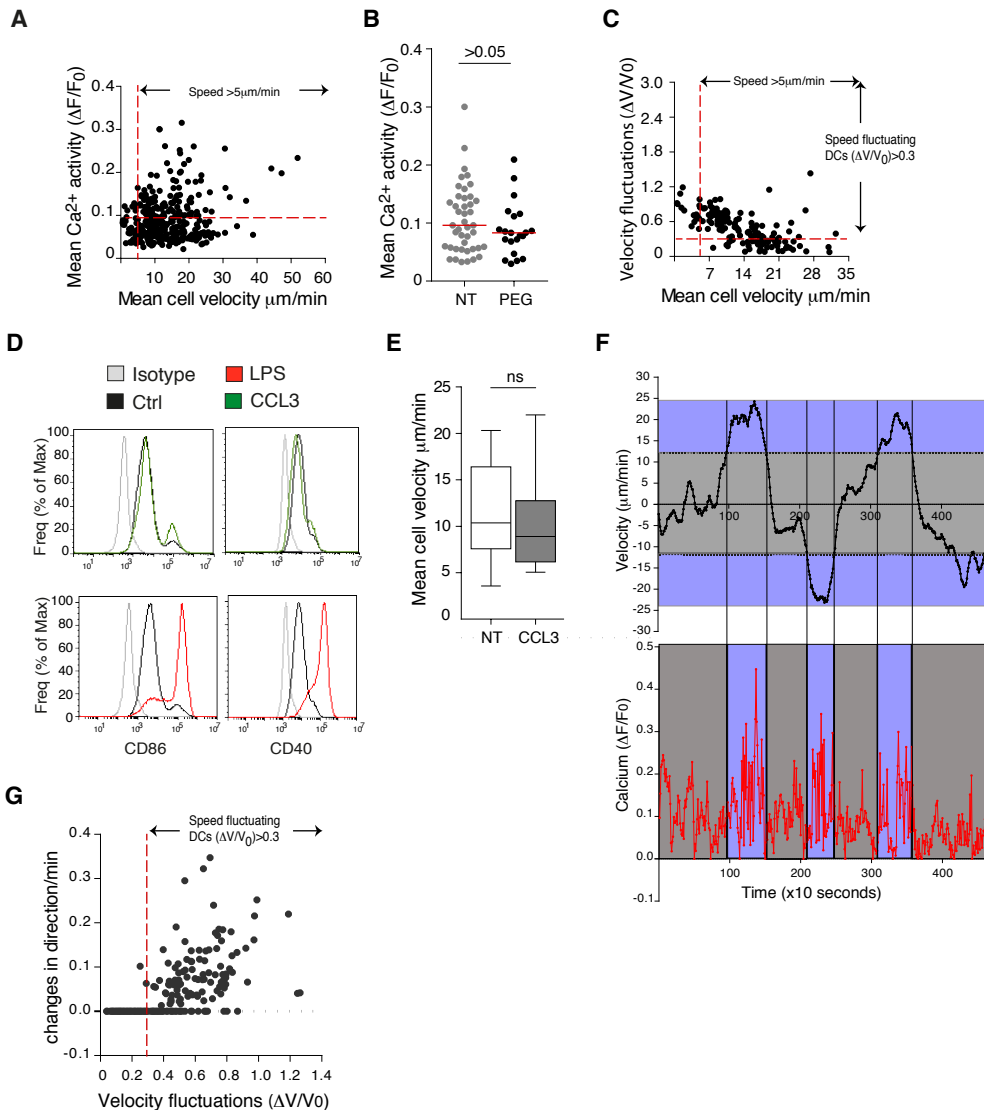

Figure S2

A: Mean intracellular calcium concentration versus mean cell velocity in migrating DCs. DCs were loaded with Oregon Green BAPTA 1-AM and imaged every 30s ( $n=113$  cells from three independent experiments).

B: Mean intracellular calcium concentration versus mean cell velocity in migrating DCs in microchannels coated with fibronectin or FibroPEG(75/25) ( $n>21$  cells from four independent experiments).

C: Distribution of velocity fluctuations ( $\Delta V/V_0$ ) displayed by immature DCs migrating in micro-channels ( $n=113$  cells from three independent experiments).

D: Expression of CD86 and CD40 in DCs treated ON with 100ng/ml CCL3 or 10  $\mu\text{g}/\text{ml}$  LPS.

E: Quantification of the median instantaneous speed of immature DCs migrating in micro-channels in the presence of 100ng/ml of CCL3.

P-values were calculated using a Mann-Whitney test, with respect to the Non-Treated DCs (NT). Boxes illustrate 10-90 percentiles of values and whiskers represent the range of values. P-values were calculated using a Kruskal-wallis test.

F: Velocity fluctuations and  $\text{Ca}^{2+}$  oscillations versus time in a single DC. Slow motility phases ( $<50\%$  of max velocity) are shown as grey boxes and fast motility phases ( $>50\%$  of max velocity) are shown as blue boxes.

G: Frequency of changes of direction versus velocity fluctuations displayed by immature DCs migrating in micro-channels ( $n=113$  cells from three independent experiments)
