# Supplementary material for: Space exploration by dendritic cells requires maintenance of myosin II activity by IP3 receptor 1
Source: PubMed Central journal article supplement — EMBO J. 2015 Jan 30;34(6):798–810. doi: 10.15252/embj.201489056 (PMC4369315; doi:10.15252/embj.201489056), 2015-01-30
Supplement: embj0034-0798-sd4.pdf [file embj0034-0798-sd4.pdf]

A

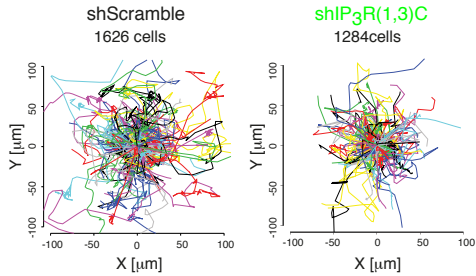

B

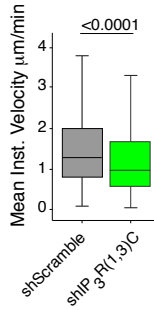

C

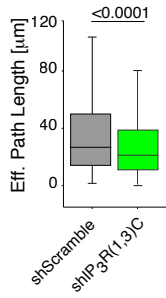

Figure S4

A-D: Analysis of shScramble- (grey, n=1629 cells) and shIP<sub>3</sub>R(1,3)C- (green, n=1284 cells)-expressing DCs migrating in collagen matrices and imaged every 2min during 7h at 10X magnification. Values were obtained from two independent experiments.

A: Representation of the individual DC trajectories of shScramble (left) and shIP<sub>3</sub>R(1,3)C- (right) expressing immature DCs migrating in a collagen matrix. B-C: Line represents the median from two independent experiments. Boxes contain 50% of all data points, the bars cover the 99.3% of the sample.

B: Graph showing the DC mean instantaneous speed. P-values were calculated with a t-test analysis.

C: Effective length displacement (L) of DCs. A Fisher's exact test (p-value=5.416\*10<sup>-10</sup>) was used for statistical analysis.
